# Supplementary material for: Deglacial and Holocene sea-ice and climate dynamics in the Bransfield Strait, northern Antarctic Peninsula
Source: Copernicus journal article supplement (doi:10.5194/cp-19-1061-2023), 2023-05-30
Supplement: Supplementary file 1 [file cp-19-1061-2023-supplement.pdf]

Supplement of *Clim. Past*, 19, 1061–1079, 2023  
<https://doi.org/10.5194/cp-19-1061-2023-supplement>  
© Author(s) 2023. CC BY 4.0 License.

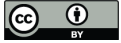

*Supplement of*

## **Deglacial and Holocene sea-ice and climate dynamics in the Bransfield Strait, northern Antarctic Peninsula**

**Maria-Elena Vorrath et al.**

*Correspondence to:* Juliane Müller ([juliane.mueller@awi.de](mailto:juliane.mueller@awi.de))

The copyright of individual parts of the supplement might differ from the article licence.

## Supplements

### S1: Radiocarbon dating

Table S1: Overview of radiocarbon data including sample name and number, material, conventional age plus error, the modelled age for correction, ventilation age, corrected age and final calibrated ages with error. Due to the lack of planktic foraminifera, we base the age model of core PS97/072-1 on benthic AMS  $^{14}\text{C}$  dates obtained from shell fragments and benthic foraminifera tests. This is usually done without problems on shallow shelves (< 400 m) where the benthos lives in a mixed layer - or in areas where nearby paired benthic-planktic AMS  $^{14}\text{C}$  ages provide a  $^{14}\text{C}$ -ventilation age for bottom waters that can be subtracted in addition to surface reservoir ages in the calibration routine. To account for the relatively deep water depth (ca. 2000 m) at core site PS97/072-1, we added a ventilation age of 1200 years to the surface reservoir age to account for the additional age of deep water masses relative to the surface waters. This is needed as Butzin et al. (2017) we use here only accounts for a reservoir age of the upper water masses between 0 - 300 m. Our estimation of ventilation age is based on paired planktic and benthic foraminifera of 1000 to 15000 years found off Chile (Siani et al., 2013) and the Kerguelen Islands (Gottschalk et al., 2020). Further, earlier comparisons of dated benthic calcareous material with AIOM-derived  $^{14}\text{C}$  ages, which had been in turn compared to planktic foraminiferal ages in various locations at the Antarctic Peninsula (Domack et al., 2001; Barcena et al., 2006; Heroy et al., 2008), as well as  $^{14}\text{C}$  ages of deep-water corals from nearby Drake Passage, independently dated by U/Th (Burke and Robinson, 2012), indicate radiocarbon ventilation ages between ca. 1100-1400 years as acceptable approach. For the calibration of the (reservoir and ventilation age corrected)  $^{14}\text{C}$  dates, we used the IntCal20 curve as this calibration does not automatically subtract “time-varying” marine reservoir ages as the new Marine20 curve. This allowed us to subtract the reservoir and ventilation ages individually based on our assumptions.

| Sample depth [cmbsf] | Sample Name        | AWI-No.  | Material            | Conventional $^{14}\text{C}$ age [a BP] | Error conv. $^{14}\text{C}$ age [a] | Modelled age for correction after Butzin et al. (2017) [a] | Ventilation age for correction [a] | Corrected $^{14}\text{C}$ age for calibration [a BP] | Calibrated age [cal. a BP] | Error of calibrated age 1 sigma [a] | Error of calibrated age 2 sigma [a] |
|----------------------|--------------------|----------|---------------------|-----------------------------------------|-------------------------------------|------------------------------------------------------------|------------------------------------|------------------------------------------------------|----------------------------|-------------------------------------|-------------------------------------|
| 190                  | PS97/072-1_190cm   | 1428.1.1 | shell fragments     | 5076                                    | 118                                 | 1076                                                       | 1200                               | 2800                                                 | 2920                       | 140                                 | 300                                 |
| 212                  | PS97/072-1_212cm   | 2744.1.1 | shell fragments     | 5246                                    | 82                                  | 1107                                                       | 1200                               | 2939                                                 | 3090                       | 120                                 | 230                                 |
| 312                  | PS97/072-1_312cm   | 1429.2.1 | shell fragments     | 6054                                    | 118                                 | 1083                                                       | 1200                               | 3771                                                 | 4170                       | 190                                 | 340                                 |
| 340                  | PS97/072-1_340cm   | 1430.1.1 | shell fragments     | 6156                                    | 52                                  | 1089                                                       | 1200                               | 3867                                                 | 4300                       | 110                                 | 160                                 |
| 451.5                | PS97/072-1_451.5cm | 1431.1.1 | shell fragments     | 7081                                    | 52                                  | 1142                                                       | 1200                               | 4739                                                 | 5410                       | 80                                  | 130                                 |
| 464                  | PS97/072-1_464cm   | 1432.2.1 | shell fragments     | 7329                                    | 117                                 | 1157                                                       | 1200                               | 4972                                                 | 5740                       | 150                                 | 260                                 |
| 866.5                | PS97/072-1_866.5cm | 7405.1.1 | benthic foraminifer | 12865                                   | 101                                 | 1599                                                       | 1200                               | 10066                                                | 11610                      | 210                                 | 330                                 |
| 868.5                | PS97/072-1_868.5cm | 7406.1.1 | benthic foraminifer | 12983                                   | 100                                 | 1571                                                       | 1200                               | 10212                                                | 12040                      | 390                                 | 530                                 |

### S2: Matching piston core PS97/072-1 and short core PS97/072-2

We matched the top of piston core PS97/072-1 with the short core PS97/072-2 from the same sample site using TOC and biogenic opal data (Fig. S1). An age model for the short core was already developed based on  $^{210}\text{Pb}$  dating (Vorrath et al., 2020). By overlapping the TOC and biogenic opal records we note that the top of the piston core likely matches the short core at a depth of 25 cm, which corresponds to the calendar year 1902 in the common era. Therefore, we have set the age of the core top of PS97/072-1 to 0.05 ka BP.

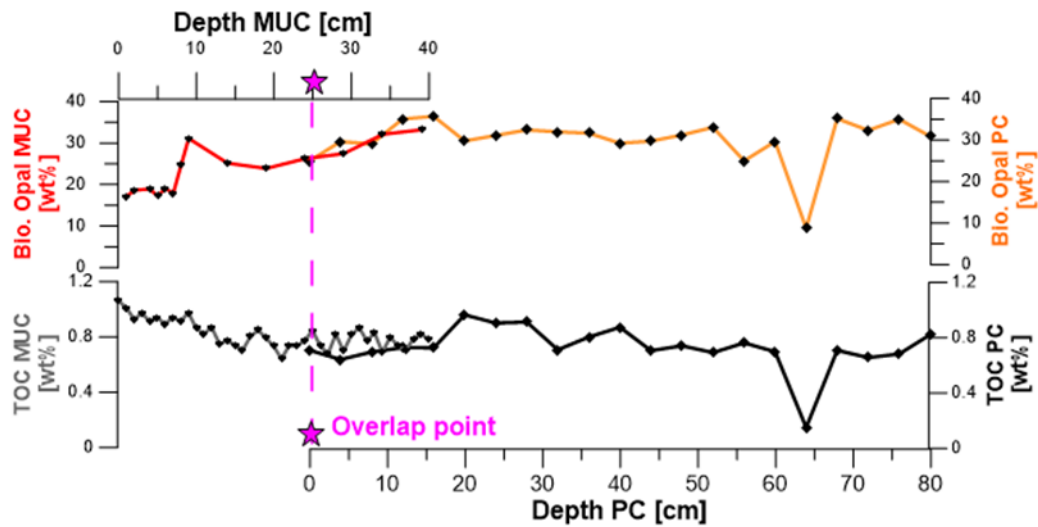

32

33 Figure S2: Overlap point of the short sediment core PS97/072-2 (MUC) and piston core PS97/072-1 (PC) based  
 34 on total organic carbon and biogenic opal (wt%). Data from the short core from Vorrath et al. (2020).

35

36

37

38 **S3:** Taxonomic list of diatoms identified in the sediments of core PS97/072-1 organized by groups according to  
 39 their habitat (Armand et al., 2005; Cárdenas et al., 2019; Crosta et al., 2005; Esper et al., 2010; Esper and Gersonde,  
 40 2014a, 2014b; Gersonde and Zielinski, 2000; Romero et al., 2005; Zielinski and Gersonde, 1997).

41

#### 42 **Benthic and epiphytic diatoms:**

43 *Achnanthes brevipes* Agardh

44 *Amphora copulata* (Kützing) Kützing

45 *A. coffaeiformis* (Agardh) Kützing

46 *Cocconeis costata* Gregory

47 *C. dalmanii* Al-Handal, Riaux-Gobin, Romero & Wulff

48 *C. fasciolata* (Ehrenberg) Brown

49 *C. californica* var. *californica* Grunow

50 *C. californica* var. *keguelensis* Heiden

51 *C. melchioroides* Al-Handal, Riaux-Gobin, Romero & Wulff

52 *C. imperatrix* Schmidt

53 *C. schuettii* Van Heurck

54 *Cocconeis* spp.

55 *Entopyla ocellata* (Arnott) Grunow

56 *Fallacia marnieri* (Manguin) Witkowski, Lange-Bertalot & Metzeltin

57 *Gomphonemopsis littoralis* (Hendey) Medlin

58 *Grammatophora angulosa* Ehrenberg

59 *Licmophora gracilis* (Kützing) Peragallo

60 *Melosira adeliae* Manguin

61 *Navicula directa* (Smith) Ralfs

62 *N. glaciei* Van Heurck

63 *N. imperfecta* Cleve

64 *N. perminuta* Grunow

65 *Paralia sulcata* (Ehrenberg) Cleve

66 *Planothidium vicentii* Manguin

67 *Pseudogomphonema kamtschaticum* (Grunow) Medlin

68

69 **Diatoms reflecting seasonal sea-ice (temperature range between -1.8 and 0°C):**

- 70 *Actinochilus* (Ehrenberg) Simonsen  
71 *Berkeleya adeliensis* Medlin  
72 *B. antarctica* Grunow  
73 *B. rutilans* (Trentepohl) Grunow  
74 *Corethron pennatum* (Grunow) Ostenfeld  
75 *Eucampia antarctica* var. *recta* Mangin  
76 *Fragilariopsis curta* (Van Heurck) Hustedt  
77 *F. cylindrus* (Grunow) Krieger  
78 *F. nana* (Steeemann Nielsen) Paasche  
79 *F. obliquecostata* (Van Heurck) Heiden  
80 *F. peragallii* (Hasle) Cremer  
81 *F. rhombica* (O'Meara) Hustedt  
82 *F. ritscheri* Hustedt  
83 *F. sublinearis* (Van Heurck) Heiden & Kolbe  
84 *F. vanheurckii* (Peragallo) Hustedt  
85 *Nitzschia hybrida* Grunow  
86 *N. stellata* Manguin  
87 *N. taeniiformis* Simonsen  
88 *Odontella weissflogii* (Janisch) Grunow *Porosira glacialis* (Grunow) Jørgensen  
89 *Porosira pseudodenticulata* (Hustedt) Jousé  
90 *Stellarima microtrias* (Ehrenberg) Hasle & Sims  
91 *Synedropsis laevis* (Heiden) Hasle, Medlin & Syvertsen  
92 *S. recta* Hasle, Syvertsen & Medlin  
93 *Synedropsis* sp.  
94 *Thalassiosira antarctica* (T1) Comber

95  
96 **Diatoms associated with cold open ocean conditions (temperature range between 1 and 4°C):**

- 97 *Asteromphalus hookeri* Ehrenberg  
98 *A. hyalinus* Karsten  
99 *Eucampia antarctica* var. *antarctica* Mangin  
100 *Fragilariopsis pseudonana* (Hasle) Hasle  
101 *F. separanda* Hustedt  
102 *Proboscia alata* (Brightwell) Sundström  
103 *P. inermis* (Castracane) Hordan & Ligowski  
104 *Proboscia* sp.  
105 *Pseudo-nitzschia turgiduloides* Hasle  
106 *Rhizosolenia antennata* f. *antennata* Sundström  
107 *R. antennata* f. *semispina* Sundström  
108 *R. polydactyla* f. *polydactyla* Castracane  
109 *R. simplex* Karsten  
110 *Shionodiscus frenguelliopsis* (Fryxell & Johansen) Alverson, Kang & Theriot  
111 *S. gracilis* var. *expectus* (VanLandingham) Alverson, Kang & Theriot  
112 *S. gracilis* var. *gracilis* (Karsten) Alverson, Kang & Theriot  
113 *Thalassiosira antarctica* (T2) Comber  
114 *T. gravida* Cleve  
115 *T. lentiginosa* (Janisch) Fryxell  
116 *T. maculata* Fryxell & Johansen  
117 *T. oliverana* Priddle & Fryxell  
118 *T. ritscheri* (Hustedt) Hasle  
119 *T. scotia* Fryxell & Hoban  
120 *T. tumida* (Janisch) Hasle  
121 *Thalassiothrix antarctica* Schimper ex Karsten  
122 *Trichotoxon reinboldii* (Van Heurck) Reid & Round

123  
124  
125  
126  
127  
128  
129  
130  
131  
132  
133  
134  
135  
136  
137  
138  
139  
140  
141  
142  
143  
144  
145  
146  
147  
148  
149  
150  
151  
152  
153  
154  
155  
156  
157  
158  
159  
160  
161  
162  
163  
164  
165  
166  
167  
168  
169  
170  
171  
172  
173  
174  
175  
176

**Diatoms associated with warmer open ocean conditions (temperature range between 4 and 14°C):**

- Azpeitia tabularis* (Grunow) Fryxell & Sims  
*Coscinodiscus oculus-iridis* (Ehrenberg) Ehrenberg  
*Fragilariopsis kerguelensis* (O'Meara) Hustedt  
*Nitzschia bicapitata* Cleve  
*Shionodiscus oestrupii* (Ostenfeld) Alverson, Kang & Theriot  
*Stephanopyxis turris* Greville & Arnott

**Reworked species:**

- Actinocyclus ingens* Rattray  
*Cladogramma* sp. Lohmann  
*Denticulopsis* spp. (Simonsen)  
*Rouxia constricta* Zielinski & Gersonde  
*R. leventerae* Bohaty, Scherer & Harwood

177 **S4: Terrigenous input, stable isotopes of TOC and IPSO<sub>25</sub>, and total diatom and CRS content**

178 The BIT indices below 0.05 and the mean molar C/N ratio below 8.5 indicate a marine origin of the organic matter  
 179 and that the input of terrigenous organic matter did not affect the composition of GDGTs. Maximum BIT values  
 180 of up to 0.05 between 13.5 ka and 12.0 ka BP may evidence an additional input of soil-derived GDGTs in response  
 181 to glacier activity. However, these values are distinctly lower than the 0.3 threshold signaling enhanced input of  
 182 terrigenous organic matter and since also the C/N values do not point to higher input of terrestrial material during  
 183 this time interval, we conclude that the GDGT paleothermometry was not affected by soil-derived GDGTs.  
 184 Organic carbon stable isotope ratios ( $\delta^{13}\text{C}$ ) range between -22.2 and -25.5‰, while the stable carbon isotope  
 185 composition of IPSO<sub>25</sub> varies between -15.1‰ and -19.5‰ supporting its origin from sea ice algae (Massé et al.,  
 186 2011; Sinninghe Damsté et al., 2007). Also shown are total diatom concentrations (without *Chaetoceros* resting  
 187 spores) and percentage of *Chaetoceros* resting spores in comparison to biogenic opal and TOC content.  
 188

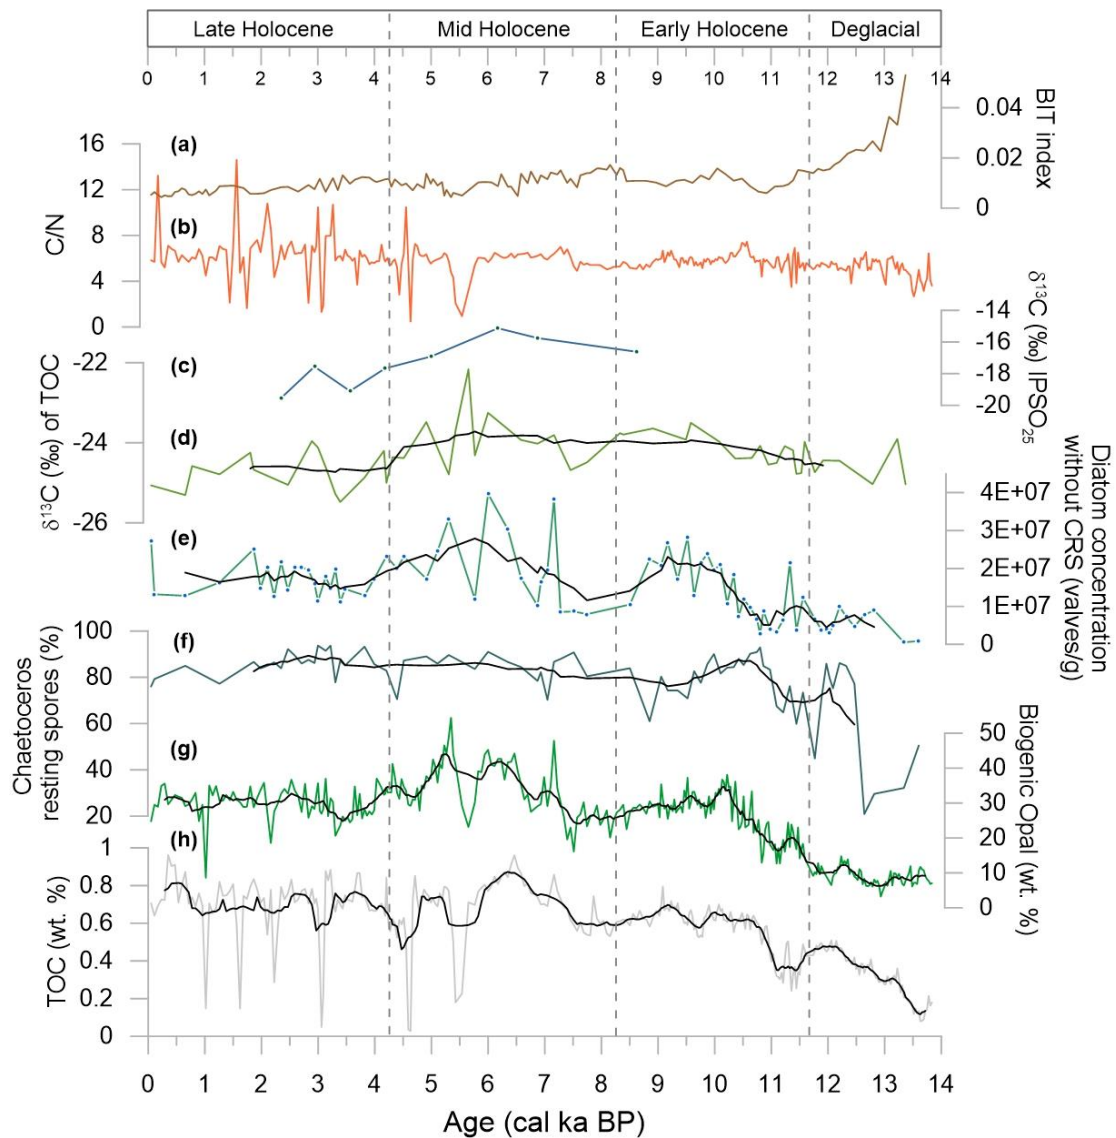

189  
 190  
 191 Figure S4: Comparison of biomarkers and selected diatom count data with stable carbon isotope composition of  
 192 organic material a) BIT index, b) C/N values, c)  $\delta^{13}\text{C}$  of IPSO<sub>25</sub>, d)  $\delta^{13}\text{C}$  of TOC, e) total diatom concentration, f)  
 193 *Chaetoceros* resting spores, g) biogenic opal content, and h) TOC content of PS97/072-1.  
 194

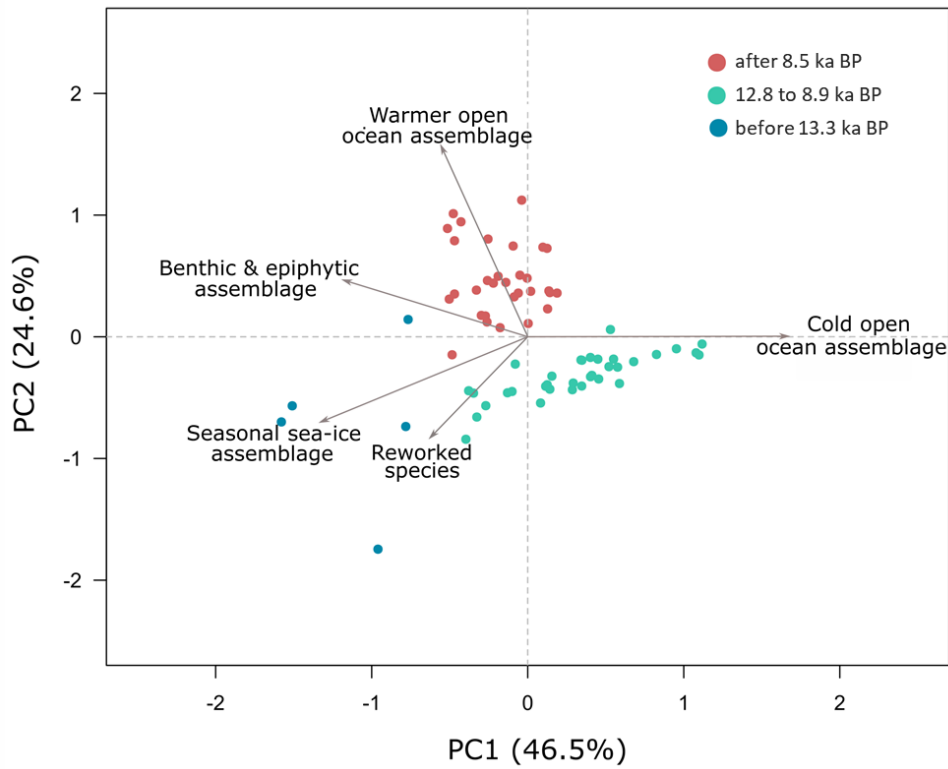

196  
 197 Figure S5: The Spearman principal component analysis (PCA) biplot shows the relationship between the five  
 198 diatom assemblages indicative for a warmer open and colder open ocean, seasonal sea-ice, benthic/epiphytic, and  
 199 reworked diatoms in core PS97/072-1. PC1 represents 46.5% and PC2 24.6% of the variance. Before 13.3 ka BP  
 200 seasonal sea-ice diatoms are common, between 12.8 ka and 8.9 ka BP assemblages of a colder open ocean are  
 201 dominant whereas a warmer open ocean is indicated by diatom assemblages from 8.5 ka BP until today.  
 202  
 203  
 204

205 **S6: Details on principal component analysis**

206 Diatom assemblages, and ages scores of Principal Component Analysis (PCA), eigenvalues and percentage of  
 207 variance explained from figure S5. The diatom assemblages can be found in the online resource  
 208 (<https://doi.pangaea.de/10.1594/PANGAEA.952279>).  
 209

| <b>Importance of components</b>                   |                        |            |            |            |            |            |
|---------------------------------------------------|------------------------|------------|------------|------------|------------|------------|
|                                                   |                        | <b>PC1</b> | <b>PC2</b> | <b>PC3</b> | <b>PC4</b> | <b>PC5</b> |
| <b>Eigenvalue</b>                                 |                        | 2.326      | 1.236      | 0.928      | 0.491      | 0.018      |
| <b>Proportion explained</b>                       |                        | 0.465      | 0.247      | 0.186      | 0.098      | 0.004      |
| <b>Cumulative proportion of variance</b>          |                        | 0.465      | 0.713      | 0.898      | 0.996      | 1          |
| <b>Species scores</b>                             |                        |            |            |            |            |            |
| <b>Assemblages</b>                                |                        | <b>PC1</b> | <b>PC2</b> | <b>PC3</b> | <b>PC4</b> | <b>PC5</b> |
| <b>Benthic and epiphytic</b>                      |                        | -1.375     | 0.600      | -0.558     | 1.034      | 0.017      |
| <b>Seasonal sea ice</b>                           |                        | -1.560     | -0.722     | 0.799      | -0.114     | 0.164      |
| <b>Open ocean cold</b>                            |                        | 1.837      | 0.061      | -0.338     | 0.326      | 0.184      |
| <b>Open ocean warm</b>                            |                        | -0.592     | 1.668      | -0.255     | -0.655     | 0.073      |
| <b>Reworked species</b>                           |                        | -0.633     | -0.908     | -1.497     | -0.408     | 0.027      |
| <b>Scores (weight sums of assemblages scores)</b> |                        |            |            |            |            |            |
| <b>Depth in core (cm)</b>                         | <b>Age [ka cal BP]</b> | <b>PC1</b> | <b>PC2</b> | <b>PC3</b> | <b>PC4</b> | <b>PC5</b> |
| 4                                                 | 0.111                  | -0.178     | 0.455      | -0.361     | 1.108      | 0.262      |
| 40                                                | 0.657                  | -0.184     | 0.499      | -0.541     | 1.664      | 0.061      |
| 80                                                | 1.265                  | -0.257     | 0.171      | 0.138      | 0.001      | -0.175     |
| 120                                               | 1.872                  | 0.022      | 0.096      | 0.176      | -0.396     | -0.055     |
| 128                                               | 1.994                  | 0.082      | 0.354      | -0.156     | 0.075      | -1.231     |
| 136                                               | 2.115                  | 0.135      | 0.732      | -0.345     | -0.054     | 0.264      |
| 144                                               | 2.237                  | -0.339     | 0.374      | 0.035      | 0.042      | -0.377     |
| 152                                               | 2.358                  | -0.451     | 0.368      | 0.004      | 0.410      | 0.624      |
| 160                                               | 2.480                  | -0.020     | 0.351      | 0.000      | -0.236     | 0.228      |
| 168                                               | 2.601                  | -0.010     | 0.498      | -0.062     | -0.343     | 0.285      |
| 176                                               | 2.723                  | 0.056      | 0.370      | -0.141     | 0.123      | 0.229      |
| 184                                               | 2.844                  | -0.430     | 0.792      | -0.327     | 0.580      | -0.375     |
| 192                                               | 2.950                  | 0.210      | 0.357      | -0.219     | 0.191      | 0.117      |
| 200                                               | 3.009                  | -0.493     | -0.166     | 0.479      | -0.163     | -0.628     |
| 216                                               | 3.139                  | -0.477     | 0.310      | 0.012      | 0.528      | 0.294      |
| 224                                               | 3.223                  | -0.049     | 0.317      | -0.062     | -0.343     | 0.450      |
| 232                                               | 3.307                  | -0.206     | 0.804      | -0.362     | 0.351      | -0.164     |
| 240                                               | 3.392                  | -0.078     | 0.464      | -0.359     | 0.943      | 0.551      |
| 248                                               | 3.476                  | -0.224     | 0.128      | -0.108     | 0.562      | 0.248      |
| 280                                               | 3.814                  | -0.458     | 0.890      | -0.212     | 0.035      | 0.425      |
| 360                                               | 4.511                  | -0.268     | 0.610      | 0.015      | -0.474     | 0.312      |
| 400                                               | 4.935                  | -0.303     | 0.559      | -0.059     | -0.037     | 0.296      |
| 440                                               | 5.359                  | 0.268      | 0.272      | 0.123      | -0.984     | -0.143     |
| 480                                               | 5.973                  | -0.391     | 0.904      | 0.282      | -1.910     | 0.435      |



| Scores (weight sums of assemblages scores) |                 |        |        |        |        |        |
|--------------------------------------------|-----------------|--------|--------|--------|--------|--------|
| Depth in core (cm)                         | Age [ka cal BP] | PC1    | PC2    | PC3    | PC4    | PC5    |
| 520                                        | 6.557           | 0.151  | 0.214  | 0.085  | -0.503 | 0.270  |
| 540                                        | 6.849           | 0.042  | 0.472  | -0.062 | -0.382 | 0.081  |
| 568                                        | 7.258           | 0.000  | 1.095  | -0.200 | -1.254 | -0.795 |
| 584                                        | 7.491           | -0.418 | 0.998  | -0.137 | -0.558 | 0.197  |
| 600                                        | 7.725           | -0.050 | 0.745  | -0.236 | -0.252 | -0.578 |
| 652                                        | 8.484           | -0.133 | 0.082  | -0.047 | 0.671  | -0.407 |
| 676                                        | 8.834           | 0.627  | -0.212 | -0.067 | 0.145  | -1.488 |
| 690                                        | 9.039           | 0.364  | -0.201 | 0.111  | -0.054 | -0.437 |
| 710                                        | 9.331           | 0.565  | -0.249 | 0.017  | 0.134  | 0.298  |
| 730                                        | 9.622           | 0.311  | -0.443 | 0.269  | 0.041  | 0.383  |
| 738                                        | 9.739           | 0.067  | -0.402 | 0.245  | 0.325  | -1.010 |
| 746                                        | 9.856           | 0.159  | -0.437 | 0.290  | 0.179  | 0.258  |
| 754                                        | 9.973           | -0.095 | -0.460 | 0.424  | 0.110  | -0.121 |
| 762                                        | 10.090          | 0.172  | -0.334 | 0.281  | -0.047 | 0.156  |
| 770                                        | 10.206          | 0.580  | -0.256 | 0.079  | -0.129 | -0.106 |
| 778                                        | 10.323          | -0.330 | -0.469 | 0.499  | 0.281  | 0.851  |
| 784                                        | 10.411          | -0.314 | -0.575 | 0.505  | -0.104 | -0.271 |
| 790                                        | 10.498          | -0.396 | -0.685 | 0.835  | -0.453 | -0.440 |
| 798                                        | 10.615          | -0.394 | -0.863 | 0.995  | -0.597 | 0.322  |
| 806                                        | 10.732          | 0.100  | -0.554 | 0.467  | -0.113 | 0.335  |
| 810                                        | 10.790          | 0.486  | -0.349 | 0.116  | 0.107  | 0.175  |
| 814                                        | 10.849          | 0.316  | -0.380 | 0.173  | 0.249  | 0.447  |
| 822                                        | 10.965          | 0.056  | -0.420 | 0.365  | -0.022 | -0.418 |
| 830                                        | 11.082          | 0.418  | -0.321 | 0.151  | 0.020  | 0.129  |
| 838                                        | 11.199          | -0.180 | -0.243 | 0.415  | -0.251 | -0.736 |
| 846                                        | 11.316          | 0.553  | 0.055  | -0.127 | -0.004 | 0.157  |
| 854                                        | 11.432          | 0.376  | -0.194 | 0.038  | 0.060  | -2.221 |
| 862                                        | 11.549          | -0.179 | -0.445 | 0.512  | -0.079 | 0.486  |
| 870                                        | 11.814          | 1.151  | -0.057 | -0.379 | 0.236  | 0.116  |
| 878                                        | 11.931          | 0.857  | -0.139 | -0.364 | 0.422  | 0.279  |
| 886                                        | 12.048          | 0.986  | -0.098 | -0.344 | 0.056  | 0.281  |
| 890                                        | 12.107          | 1.110  | -0.131 | -0.289 | 0.141  | 0.184  |
| 894                                        | 12.166          | 1.135  | -0.142 | -0.303 | 0.174  | 0.138  |
| 902                                        | 12.283          | 0.418  | -0.178 | 0.032  | -0.171 | 0.373  |
| 910                                        | 12.400          | 0.591  | -0.367 | 0.095  | 0.066  | 0.223  |
| 920                                        | 12.547          | 0.427  | -0.334 | 0.142  | 0.080  | 0.289  |
| 932                                        | 12.723          | 0.367  | -0.414 | 0.275  | -0.118 | 0.569  |
| 944                                        | 12.899          | -0.355 | -0.453 | 0.174  | -0.368 | 0.134  |
| 980                                        | 13.427          | -0.865 | -1.699 | -3.482 | -0.984 | -0.079 |
| 1000                                       | 13.721          | -1.601 | -0.704 | 0.383  | 0.483  | 0.031  |

## References

- Armand, L. K., Crosta, X., Romero, O. and Pichon, J.-J.: The biogeography of major diatom taxa in Southern Ocean sediments: 1. Sea ice related species, *Palaeogeography, Palaeoclimatology, Palaeoecology*, 223(1–2), 93–126, doi:10.1016/J.PALAEO.2005.02.015, 2005.
- Barcena, M.Á., Canals, M., Fabrès, J., Flores, J.A., Isla, E., Palanques, A. and Sierro, F.J.: Holocene neoglacial events in the Bransfield Strait (Antarctica). Palaeoenvironmental and paleoclimatic significance. *Scientia Marina* 70, 607–619, 2006.
- Burke, A. and L. F. Robinson: The Southern Ocean's Role in Carbon Exchange During the Last Deglaciation. *Science* 335(6068): 557–561, 2012.
- Cárdenas, P., Lange, C. B., Vernet, M., Esper, O., Srain, B., Vorrath, M.-E., Ehrhardt, S., Müller, J., Kuhn, G., Arz, H. W., Lembke-Jene, L., Lamy, F.: Biogeochemical proxies and diatoms in surface sediments across the Drake Passage reflect oceanic domains and frontal systems in the region, *Progress in Oceanography*, 174, 72–88, doi:10.1016/j.pocean.2018.10.004, 2019.
- Crosta, X., Romero, O., Armand, L. K. and Pichon, J.-J.: The biogeography of major diatom taxa in Southern Ocean sediments: 2. Open ocean related species, *Palaeogeography, Palaeoclimatology, Palaeoecology*, 223(1–2), 66–92, doi:10.1016/j.palaeo.2005.03.028, 2005.
- Domack, E., Leventer, A., Dunbar, R., Taylor, F., Brachfeld, S., Sjunneskogs, C. and ODP Leg 178 Scientific Party: Chronology of the Palmer Deep site, Antarctic Peninsula: a Holocene palaeoenvironmental reference for the circum-Antarctic. *The Holocene*, 11(1), 1–9, doi:10.1191/095968301673881493, 2001.
- Esper, O. and Gersonde, R.: New tools for the reconstruction of Pleistocene Antarctic sea ice, *Palaeogeography, Palaeoclimatology, Palaeoecology*, 399, 260–283, doi:10.1016/J.PALAEO.2014.01.019, 2014a.
- Esper, O. and Gersonde, R.: Quaternary surface water temperature estimations: New diatom transfer functions for the Southern Ocean, *Palaeogeography, Palaeoclimatology, Palaeoecology*, 414, 1–19, doi:10.1016/J.PALAEO.2014.08.008, 2014b.
- Esper, O., Gersonde, R. and Kadagies, N.: Diatom distribution in southeastern Pacific surface sediments and their relationship to modern environmental variables, *Palaeogeography, Palaeoclimatology, Palaeoecology*, 287(1–4), 1–27, doi:10.1016/J.PALAEO.2009.12.006, 2010.
- Gersonde, R. and Zielinski, U.: The reconstruction of late Quaternary Antarctic sea-ice distribution — the use of diatoms as a proxy for sea-ice, 162, 263–286, doi:10.1016/S0031-0182(00)00131-0, 2000.
- Heroy, D. C., Sjunneskog, C. and Anderson, J. B.: Holocene climate change in the Bransfield Basin, Antarctic Peninsula: evidence from sediment and diatom analysis, *Antarctic Science*, 20(01), 69–87, doi:10.1017/S0954102007000788, 2008.
- Massé, G., Belt, S. T., Crosta, X., Schmidt, S., Snape, I., Thomas, D. N. and Rowland, S. J.: Highly branched isoprenoids as proxies for variable sea ice conditions in the Southern Ocean, *Antarctic Science*, 23(05), 487–498, doi:10.1017/S0954102011000381, 2011.
- Romero, O. E., Armand, L. K., Crosta, X. and Pichon, J.-J.: The biogeography of major diatom taxa in Southern Ocean surface sediments: 3. Tropical/Subtropical species, *Palaeogeography, Palaeoclimatology, Palaeoecology*, 223(1–2), 49–65, doi:10.1016/j.palaeo.2005.03.027, 2005.
- Sinninghe Damsté, J. S., Rijpstra, W. I. C., Coolen, M. J. L., Schouten, S. and Volkman, J. K.: Rapid sulfurisation of highly branched isoprenoid (HBI) alkenes in sulfidic Holocene sediments from Ellis Fjord, Antarctica, *Organic Geochemistry*, 38(1), 128–139, doi:10.1016/j.orggeochem.2006.08.003, 2007.
- Vorrath, M.-E., Müller, J., Rebolledo, L., Cárdenas, P., Shi, X., Esper, O., Opel, T., Geibert, W., Muñoz, P., Haas, C., Kuhn, G., Lange, C. B., Lohmann, G. and Mollenhauer, G.: Sea ice dynamics in the Bransfield Strait, Antarctic Peninsula, during the past 240 years: a multi-proxy intercomparison study, *Climate of the Past*, 16(6), 2459–2483, doi:10.5194/cp-16-2459-2020, 2020.
- Zielinski, U. and Gersonde, R.: Diatom distribution in Southern Ocean surface sediments (Atlantic sector): Implications for paleoenvironmental reconstructions, *Palaeogeography, Palaeoclimatology, Palaeoecology*, 129(3–4), 213–250, doi:10.1016/S0031-0182(96)00130-7, 1997.
